# Supplementary material for: Exclusion Diets in Functional Dyspepsia
Source: MDPI journal article supplement (doi:10.3390/nu14102057), 2022-05-14
Supplement: s1 [file s1]

**Table S1.** NHLBI Quality Assessment Tool for Controlled Intervention Studies

| Criteria                                                                                                                                                             | Shahbazkhani et al. (2020) | Elli et al. (2016) | Potter et al. (2020) | Goyal et al. (2021) |
|----------------------------------------------------------------------------------------------------------------------------------------------------------------------|----------------------------|--------------------|----------------------|---------------------|
| 1. Was the study described as randomized, a randomized trial, a randomized clinical trial, or an RCT?                                                                | Yes                        | Yes                | Yes                  | Yes                 |
| 2. Was the method of randomization adequate (i.e., use of randomly generated assignment)?                                                                            | Yes                        | Yes                | Yes                  | Yes                 |
| 3. Was the treatment allocation concealed (so that assignments could not be predicted)?                                                                              | Yes                        | Yes                | Yes                  | Yes                 |
| 4. Were study participants and providers blinded to treatment group assignment?                                                                                      | No                         | No                 | No                   | No                  |
| 5. Were the people assessing the outcomes blinded to the participants' group assignments?                                                                            | Yes                        | Yes                | Yes                  | Yes                 |
| 6. Were the groups similar at baseline on important characteristics that could affect outcomes (e.g., demographics, risk factors, co-morbid conditions)?             | Yes                        | NR                 | NR                   | Yes                 |
| 7. Was the overall drop-out rate from the study at endpoint 20% or lower of the number allocated to treatment?                                                       | No                         | Yes                | Yes                  | No                  |
| 8. Was the differential drop-out rate (between treatment groups) at endpoint 15 percentage points or lower?                                                          | Yes                        | Yes                | Yes                  | Yes                 |
| 9. Was there high adherence to the intervention protocols for each treatment group?                                                                                  | NR                         | NR                 | NR                   | Yes                 |
| 10. Were other interventions avoided or similar in the groups (e.g., similar background treatments)?                                                                 | Yes                        | NR                 | NR                   | NR                  |
| 11. Were outcomes assessed using valid and reliable measures, implemented consistently across all study participants?                                                | Yes                        | Yes                | Yes                  | Yes                 |
| 12. Did the authors report that the sample size was sufficiently large to be able to detect a difference in the main outcome between groups with at least 80% power? | NR                         | Yes                | No                   | NR                  |
| 13. Were outcomes reported or subgroups analyzed prespecified (i.e., identified before analyses were conducted)?                                                     | No                         | No                 | No                   | Yes                 |
| 14. Were all randomized participants analyzed in the group to which they were originally assigned, i.e., did they use an intention-to-treat analysis?                | Yes                        | Yes                | Yes                  | Yes                 |
| Rating                                                                                                                                                               | Good                       | Good               | Fair                 | Good                |

NR: Not Reported

**Table S2.** The Newcastle-Ottawa Scale (NOS) for assessing the quality of case-control studies

| Study                           | Selection           |                                 |                       |                        | Comparability                                                                    |                           | Exposure                                            |                   | Score |      |
|---------------------------------|---------------------|---------------------------------|-----------------------|------------------------|----------------------------------------------------------------------------------|---------------------------|-----------------------------------------------------|-------------------|-------|------|
|                                 | Adequate definition | Representativeness of the cases | Selection of Controls | Definition of controls | Comparativeness of the cases and controls on the basis of the design or analysis | Ascertainment of exposure | Same method of ascertainment for cases and controls | Non-Response rate |       |      |
| <i>Du et al. (2017)</i>         | *                   | *                               | *                     | *                      | *                                                                                | *                         | *                                                   | -                 | (7)   | Good |
| <i>Staudacher et al. (2021)</i> | *                   | *                               | *                     | *                      | **                                                                               | *                         | *                                                   | -                 | (8)   | Good |

**Table S3.** NHLBI Quality Assessment Tool for Before-After Studies with no control group

| Criteria                                                                                                                                                                                                                    | Tejedor et al. (2020) |
|-----------------------------------------------------------------------------------------------------------------------------------------------------------------------------------------------------------------------------|-----------------------|
| 1. Was the study question or objective clearly stated?                                                                                                                                                                      | Yes                   |
| 2. Were eligibility/ selection criteria for the study population prespecified and clearly described?                                                                                                                        | Yes                   |
| 3. Were the participants in the study representative of those who would be eligible for the test/service/intervention in the general or clinical population of interest?                                                    | Yes                   |
| 4. Were all eligible participants that met the prespecified entry criteria enrolled?                                                                                                                                        | No                    |
| 5. Was the sample size sufficiently large to provide confidence findings?                                                                                                                                                   | Yes                   |
| 6. Was the test/service/intervention clearly described and delivered consistently across the study population?                                                                                                              | Yes                   |
| 7. Were the outcome measures prespecified, clearly defined, valid, reliable, and assessed consistently across all study participants?                                                                                       | CD                    |
| 8. Were the people assessing the outcomes blinded to the participants' exposures/interventions?                                                                                                                             | CD                    |
| 9. Was the loss to follow-up after baseline 20% or less? Were those lost to follow-up accounted for in the analysis?                                                                                                        | CD                    |
| 10. Did the statistical methods examine changes in outcome measures from before to after the intervention? Were statistical tests done that provided p values for the pre-to-post changes?                                  | Yes                   |
| 11. Were outcome measures of interest taken multiple times before the intervention and multiple times after the intervention (i.e., did they use an interrupted time-series design)?                                        | CD                    |
| 12. If the intervention was conducted at a group level (e.g., a whole hospital, a community, etc.) did the statistical analysis take into account the use of individual-level data to determine effects at the group level? | Yes                   |
| Rating                                                                                                                                                                                                                      | Fair                  |

CD: can't determine

**Table S4.** The Newcastle-Ottawa Scale (NOS) for assessing the quality of cross-sectional studies

| Study                      | Selection                 |             |                 |                                             | Comparability | Outcome                   |                  | Score | Rating |
|----------------------------|---------------------------|-------------|-----------------|---------------------------------------------|---------------|---------------------------|------------------|-------|--------|
|                            | Sample representativeness | Sample size | Non-Respondents | Ascertainment of the exposure (risk factor) | Comparability | Assessment of the outcome | Statistical test |       |        |
| <i>Adibi et al. (2021)</i> | *                         | *           | *               | **                                          | *             | *                         | *                | (9)   | Good   |
